# Supplementary material
Source: publisher site journal article supplement (https://kjim.org/upload/media/kjim-2024-339-Supplementary-Table-2.pdf)
Supplement: Supplementary file 1 [file kjim-2024-339-Supplementary-Table-2.pdf]

**Supplementary Table 2. Random forest classifier analysis of saliva samples by groups**

| Act. group                  | Pred. group (train set) |    |    |    | Correctly classified | Pred. group (test set) |    |    |    | Correctly classified |       |
|-----------------------------|-------------------------|----|----|----|----------------------|------------------------|----|----|----|----------------------|-------|
|                             | Control                 | LG | HG | GC |                      | Control                | LG | HG | GC |                      |       |
| Control                     | 68                      | 0  | 0  | 0  | 100.0%               | 32                     | 0  | 0  | 0  | 100.0%               |       |
| LG                          | 2                       | 57 | 0  | 13 | 79.2%                | 1                      | 20 | 3  | 4  | 71.4%                |       |
| HG                          | 0                       | 2  | 59 | 8  | 85.5%                | 3                      | 1  | 20 | 7  | 64.5%                |       |
| GC                          | 2                       | 1  | 1  | 67 | 94.4%                | 1                      | 3  | 0  | 25 | 86.2%                |       |
| Overall correct class. Rate |                         |    |    |    | 89.6%                |                        |    |    |    |                      | 80.8% |

The random forest classifier was performed using *Cutibacterium acnes*, *Ralstonia insidiosa*, *Streptococcus oralis*, and *Pseudomonas antarctica*, identified as group-discriminative by MaAsLin2 analysis of saliva samples. To address sample imbalance, SMOTE was applied, generating a balanced dataset of 100 samples.

Pred., predicted group; Act., actual group; LG, low-grade dysplasia; HG, high-grade dysplasia; GC, gastric cancer.
